# Supplementary material
Source: publisher figshare collection journal article supplement (https://asha.figshare.com/articles/dataset/_/12978194)
Supplement: Supplementary file 1 [file 1]

### Supplemental Material S3.

Items and descriptive statistics for self-efficacy (speech-related questions)

**Please rate how certain you are that you can do the things discussed below by dragging the slider to the appropriate number. Note that you will need to click on or move the slider at least slightly for your answer to be counted. The first series of questions has to do with your perceived self-efficacy in modifying physical speech disruption in children who stutter. For the purposes of this survey, we define self-efficacy as: Your perceived ability to achieve certain outcomes. Rate your degree of confidence by recording a number from 0 to 10 using the following scale: 0 = cannot do at all; 5 = moderately can do; 10 = highly certain can do**

| # | Field                                                                                                      | Minimum | Maximum | Mean | Std<br>Deviation | Variance | Count |
|---|------------------------------------------------------------------------------------------------------------|---------|---------|------|------------------|----------|-------|
| 1 | Help the children to reduce their amount of observable stuttering (repetitions, prolongations, and blocks) | 1.00    | 10.00   | 6.54 | 1.87             | 3.51     | 312   |
| 2 | Help the children change their stuttering so it is less severe                                             | 0.00    | 10.00   | 6.66 | 1.96             | 3.85     | 312   |
| 3 | Assist the children in reducing tension in their speech                                                    | 1.00    | 10.00   | 6.73 | 1.87             | 3.48     | 312   |
| 4 | Model for the children the strategies that I want them to demonstrate                                      | 3.00    | 10.00   | 8.28 | 1.72             | 2.97     | 312   |
| 5 | Increase children's ability to identify their moments of stuttering                                        | 2.00    | 10.00   | 7.61 | 1.74             | 3.03     | 312   |
| 6 | Reduce the children's use of secondary behaviors (e.g., limb and facial movements)                         | 1.00    | 10.00   | 5.77 | 2.15             | 4.63     | 312   |
| 7 | Increase naturalness and spontaneity of the children's speech                                              | 0.00    | 10.00   | 6.11 | 2.06             | 4.25     | 312   |
| 8 | Write therapy goals for modifying the children's speech behaviors                                          | 1.00    | 10.00   | 7.47 | 2.06             | 4.26     | 312   |
