# Supplementary material
Source: publisher figshare collection journal article supplement (https://asha.figshare.com/articles/dataset/_/12978194)
Supplement: Supplementary file 2 [file 1]

## Supplemental Material S6.

Items and descriptive statistics for self-efficacy (social questions)

**The next series of questions has to do with your perceived self-efficacy in addressing social aspects of stuttering. For the purposes of this survey, we define self-efficacy as: Your perceived ability to achieve certain outcomes. Rate your degree of confidence by recording a number from 0 to 10 using the following scale: 0 = cannot do at all; 5 = moderately can do; 10 = highly certain can do**

| #  | Field                                                                                               | Minimum | Maximum | Mean | Std<br>Deviation | Variance | Count |
|----|-----------------------------------------------------------------------------------------------------|---------|---------|------|------------------|----------|-------|
| 1  | Increase children's exposure to other people who stutter                                            | 0.00    | 10.00   | 5.47 | 2.62             | 6.86     | 300   |
| 2  | Provide information about self-help or support group conferences or meetings for people who stutter | 0.00    | 10.00   | 6.34 | 2.79             | 7.78     | 300   |
| 3  | Help children to disclose their stuttering to other people                                          | 0.00    | 10.00   | 6.28 | 2.39             | 5.70     | 300   |
| 4  | Assist children in learning how to respond to instances of bullying                                 | 1.00    | 10.00   | 6.56 | 2.35             | 5.53     | 300   |
| 5  | Increase children's ability to educate other people about stuttering                                | 0.00    | 10.00   | 6.80 | 2.30             | 5.31     | 300   |
| 6  | Educate family members about how they can best support their children                               | 1.00    | 10.00   | 7.50 | 2.05             | 4.22     | 300   |
| 7  | Increase the children's assertiveness when communicating with others                                | 0.00    | 10.00   | 6.51 | 2.17             | 4.70     | 300   |
| 8  | Educate teachers about how to best support children who stutter in the classroom                    | 0.00    | 10.00   | 7.82 | 1.93             | 3.71     | 300   |
| 9  | Alert key school personnel to instances of bullying of children who stutter                         | 1.00    | 10.00   | 8.28 | 1.99             | 3.95     | 300   |
| 10 | Write goals that address social aspects of stuttering                                               | 0.00    | 10.00   | 6.40 | 2.60             | 6.74     | 300   |
