# Supplementary material
Source: publisher figshare collection journal article supplement (https://asha.figshare.com/articles/dataset/_/12978194)
Supplement: Supplementary file 3 [file 1]

## Supplemental Material S5.

Items and descriptive statistics for self-efficacy (affective/emotional questions)

**The next series of questions has to do with your perceived self-efficacy in addressing emotional aspects of stuttering. For the purposes of this survey, we define self-efficacy as: Your perceived ability to achieve certain outcomes. Rate your degree of confidence by recording a number from 0 to 10 using the following scale: 0 = cannot do at all; 5 = moderately can do; 10 = highly certain can do**

| # | Field                                                                               | Minimum | Maximum | Mean | Std<br>Deviation | Variance | Count |
|---|-------------------------------------------------------------------------------------|---------|---------|------|------------------|----------|-------|
| 1 | Address children's feelings about their speech                                      | 1.00    | 10.00   | 7.21 | 1.99             | 3.97     | 304   |
| 2 | Help children to cope with the stresses related to stuttering                       | 1.00    | 10.00   | 6.56 | 2.14             | 4.58     | 304   |
| 3 | Increase children's self-confidence in speaking                                     | 1.00    | 10.00   | 6.96 | 1.97             | 3.86     | 304   |
| 4 | Help children to speak without shame regardless of stuttering                       | 1.00    | 10.00   | 6.71 | 1.99             | 3.97     | 304   |
| 5 | Help desensitize children to their stuttering                                       | 0.00    | 10.00   | 6.46 | 2.21             | 4.89     | 304   |
| 6 | Help the children cope with unpredictable variability of stuttering                 | 1.00    | 10.00   | 6.23 | 2.18             | 4.75     | 304   |
| 7 | Help the children to cope with negative social responses associated with stuttering | 1.00    | 10.00   | 6.27 | 2.17             | 4.72     | 304   |
| 8 | Assist children in reducing avoidance of stuttering                                 | 1.00    | 10.00   | 6.26 | 2.20             | 4.83     | 304   |
| 9 | Write goals that address the children's emotions related to stuttering              | 0.00    | 10.00   | 6.08 | 2.64             | 6.96     | 304   |
