# Supplementary material
Source: publisher figshare collection journal article supplement (https://asha.figshare.com/articles/dataset/_/12978194)
Supplement: Supplementary file 4 [file 1]

## Supplemental Material S4.

Items and descriptive statistics for self-efficacy (cognitive questions)

**The next series of questions has to do with your perceived self-efficacy in addressing cognitive aspects of stuttering. For the purposes of this survey, we define self-efficacy as: Your perceived ability to achieve certain outcomes. Rate your degree of confidence by recording a number from 0 to 10 using the following scale: 0 = cannot do at all; 5 = moderately can do; 10 = highly certain can do**

| # | Field                                                                            | Minimum | Maximum | Mean | Std<br>Deviation | Variance | Count |
|---|----------------------------------------------------------------------------------|---------|---------|------|------------------|----------|-------|
| 1 | Help the children to develop a better attitude about stuttering                  | 2.00    | 10.00   | 7.29 | 1.78             | 3.15     | 308   |
| 2 | Help the children to develop a better attitude about themselves as communicators | 2.00    | 10.00   | 7.47 | 1.72             | 2.97     | 308   |
| 3 | Help the children to develop a better sense of self-worth overall                | 2.00    | 10.00   | 7.52 | 1.75             | 3.05     | 308   |
| 4 | Educate the children about the disorder of stuttering                            | 2.00    | 10.00   | 8.25 | 1.58             | 2.50     | 308   |
| 5 | Help the children to accept the fact that they stutter                           | 1.00    | 10.00   | 7.08 | 1.93             | 3.72     | 308   |
| 6 | Get the children to engage in positive self-talk                                 | 2.00    | 10.00   | 7.29 | 1.92             | 3.69     | 308   |
| 7 | Write therapy goals that focus on the children's thoughts about stuttering       | 0.00    | 10.00   | 6.42 | 2.55             | 6.48     | 308   |
